# Supplementary material for: Co-Expression Network Analysis of Micro-RNAs and Proteins in the Alzheimer’s Brain: A Systematic Review of Studies in the Last 10 Years
Source: MDPI journal article supplement (doi:10.3390/cells10123479), 2021-12-09
Supplement: s1 [file s1]

## SUPPLEMENTARY MATERIALS

### Co-expression Network Analysis of Micro-RNAs and Proteins in the Alzheimer's Brain: A Systematic Review

Rachel Tasker <sup>1,†</sup>, Joseph Rowlands <sup>1,†</sup>, Zubair Ahmed <sup>1,2,3</sup>, Valentina Di Pietro <sup>1,2,3,\*</sup>

<sup>1</sup>Institute of Inflammation and Ageing, University of Birmingham, Edgbaston, Birmingham, B15 2TT, UK; rxt872@student.bham.ac.uk; joe.j.rowlands747@gmail.com; z.ahmed.1@bham.ac.uk; v.dipietro@bham.ac.uk.

<sup>2</sup>Surgical Reconstruction and Microbiology Research Centre, National Institute for Health Research, Queen Elizabeth Hospital, Birmingham, B15 2TH, UK.

<sup>3</sup>Centre for Trauma Sciences Research, University of Birmingham, Edgbaston, Birmingham, B15 2TT, UK.

<sup>†</sup>These authors contributed equally

**\*Correspondence:** v.dipietro@bham.ac.uk.

## Supplementary Materials

Pathway analyses

Figure S1

Table S1

Table S2

Table S3

Table S4

**Table S1:** Full list of DE-miRNAs in the 28 selected studies. 113 DE-miRNAs were found differentially expressed either by qRT-PCR or RNAseq, in different regions of AD pateint brains (Braak stage> IV). 53 of them were analysed by qRT-PCR and used for the meta-analysis. **Notes:** HC=Hippocampus, TC=Temporal Cortex, MTG=medial Temporal Gyrus, MFG = Medial Frontal Gyrus, FC = Frontal Cortex, CB = Cerebellum, FNC = Frontal Neo Cortex, STG = Superior temporal gyrus, BDE= Brain Derived Exosome, TL=Temporal Lobe, TNC= Temporal Neo Cortex, FNC= Frontal Neo Cortex, BA10= Brodmann Area 10, PFC= Pre Frontal Cortex, TG= Temporal Gyrus, LC= Locus Coeruleus, EC= Entorhinal Cortex, DG= Dentate Gyrus, BA9= Brodmann Area 9.

| miRNA         | brain region | Braak stage | fold change | type of analysis | Reference |
|---------------|--------------|-------------|-------------|------------------|-----------|
| miR-146       | TC           | all         | UP          | qRT-PCR          | 27        |
| miR-132       | CB           | all         | DOWN        | qRT-PCR          | 27        |
| miR-146a      | TC           | IV          | UP          | qRT-PCR          | 27        |
| miR-146a      | FC           | IV          | UP          | qRT-PCR          | 27        |
| miR-146a      | CB           | IV          | UP          | qRT-PCR          | 27        |
| miR-132       | CB           | IV          | DOWN        | qRT-PCR          | 27        |
| miR-132       | TC           | IV          | UP          | qRT-PCR          | 27        |
| miR-9         | FC           | IV          | UP          | qRT-PCR          | 27        |
| miR-9         | CB           | IV          | UP          | qRT-PCR          | 27        |
| miR-9         | TC           | IV          | UP          | qRT-PCR          | 27        |
| miR-346       | FC, BA9      | VI          | DOWN        | qRT-PCR          | 28        |
| miR-16        | FC           |             | DOWN        | qRT-PCR          | 33        |
| miR-16        | FC           |             | DOWN        | qRT-PCR          | 33        |
| miR-3157-5p   | FC, BDE      |             | UP          | RNA-seq          | 34        |
| miR-190a-5p   | FC, BDE      |             | UP          | RNA-seq          | 34        |
| miR-548v      | FC, BDE      |             | UP          | RNA-seq          | 34        |
| miR-374b-5b   | FC, BDE      |             | UP          | RNA-seq          | 34        |
| miR-374c-3p   | FC, BDE      |             | UP          | RNA-seq          | 34        |
| miR-4284      | FC, BDE      |             | DOWN        | RNA-seq          | 34        |
| miR-132-5p    | FC, BDE      |             | DOWN        | RNA-seq          | 34        |
| miR-5001-3p   | FC, BDE      |             | DOWN        | RNA-seq          | 34        |
| miR-219a-2-3p | FC, BDE      |             | UP          | RNA-seq          | 34        |
| miR-550a-3p   | FC, BDE      |             | UP          | RNA-seq          | 34        |

|               |         |      |      |           |    |
|---------------|---------|------|------|-----------|----|
| miR-550b-2-5p | FC, BDE |      | UP   | RNA-seq   | 34 |
| miR-17-5p     | FC, BDE |      | DOWN | RNA-seq   | 34 |
| miR-18a-5p    | FC, BDE |      | DOWN | RNA-seq   | 34 |
| miR-501-3p    | MTG     | V-VI | UP   | miRNA-seq | 43 |
| miR-10a-5p    | MTG     | V-VI | UP   | miRNA-seq | 43 |
| miR-320a      | MTG     | V-VI | DOWN | miRNA-seq | 43 |
| miR-28-3p     | MTG     | V-VI | UP   | miRNA-seq | 43 |
| miR-30a-3p    | MTG     | V-VI | DOWN | miRNA-seq | 43 |
| miR-941       | MFG     | V-VI | DOWN | miRNA-seq | 43 |
| miR-184       | HC      | V-VI | DOWN | miRNA-seq | 43 |
| miR-34c-3p    | HC      | V-VI | DOWN | miRNA-seq | 43 |
| miR-375       | HC      | V-VI | DOWN | miRNA-seq | 43 |
| miR-132-3p    | HC      | V-VI | DOWN | miRNA-seq | 43 |
| miR-539-5p    | MTG     | V-VI | DOWN | miRNA-seq | 43 |
| miR-132-5p    | MTG     | V-VI | DOWN | miRNA-seq | 43 |
| miR-212-3p    | MTG     | V-VI | DOWN | miRNA-seq | 43 |
| miR-132-3p    | MTG     | V-VI | DOWN | miRNA-seq | 43 |
| miR-212-5p    | MTG     | V-VI | DOWN | miRNA-seq | 43 |
| miR-582-5p    | MFG     | V-VI | DOWN | miRNA-seq | 43 |
| miR-889-3p    | MFG     | V-VI | DOWN | miRNA-seq | 43 |
| miR-212-5p    | MFG     | V-VI | DOWN | miRNA-seq | 43 |
| miR-212-3p    | MFG     | V-VI | DOWN | miRNA-seq | 43 |
| miR-132-3p    | MFG     | V-VI | DOWN | miRNA-seq | 43 |
| miR-132-5p    | MFG     | V-VI | DOWN | miRNA-seq | 43 |
| miR-10a-5p    | MTG     | V-VI | UP   | qRT-PCR   | 43 |
| miR-28-3p     | MTG     | V-VI | UP   | qRT-PCR   | 43 |
| miR-184       | HC      | V-VI | DOWN | qRT-PCR   | 43 |
| miR-34c-3p    | HC      | V-VI | DOWN | qRT-PCR   | 43 |
| miR-375       | HC      | V-VI | DOWN | qRT-PCR   | 43 |
| miR-132-3p    | HC      | V-VI | DOWN | qRT-PCR   | 43 |
| miR-132-5p    | HC      | V-VI | DOWN | qRT-PCR   | 43 |
| miR-212-3p    | HC      | V-VI | DOWN | qRT-PCR   | 43 |
| miR-212-5p    | HC      | V-VI | DOWN | qRT-PCR   | 43 |
| miR-539-5p    | MTG     | V-VI | DOWN | qRT-PCR   | 43 |
| miR-132-3p    | MTG     | V-VI | DOWN | qRT-PCR   | 43 |
| miR-132-5p    | MTG     | V-VI | DOWN | qRT-PCR   | 43 |
| miR-212-3p    | MTG     | V-VI | UP   | qRT-PCR   | 43 |
| miR-212-5p    | MTG     | V-VI | DOWN | qRT-PCR   | 43 |
| miR-132-3p    | MFG     | V-VI | DOWN | qRT-PCR   | 43 |
| miR-132-5p    | MFG     | V-VI | DOWN | qRT-PCR   | 43 |
| miR-212-3p    | MFG     | V-VI | DOWN | qRT-PCR   | 43 |
| miR-212-5p    | MFG     | V-VI | DOWN | qRT-PCR   | 43 |
| miR-184       | HC      | V-VI | DOWN | qRT-PCR   | 43 |
| miR-34c-3p    | HC      | V-VI | DOWN | qRT-PCR   | 43 |
| miR-375       | HC      | V-VI | DOWN | qRT-PCR   | 43 |
| miR-132-3p    | HC      | V-VI | DOWN | qRT-PCR   | 43 |

|             |          |      |      |         |    |
|-------------|----------|------|------|---------|----|
| miR-132-5p  | HC       | V-VI | DOWN | qRT-PCR | 43 |
| miR-212-3p  | HC       | V-VI | DOWN | qRT-PCR | 43 |
| miR-212-5p  | HC       | V-VI | DOWN | qRT-PCR | 43 |
| miR-486-3p  | FC, BDE  |      | UP   | RNA-seq | 44 |
| miR-200b-5p | FC, BDE  |      | UP   | RNA-seq | 44 |
| miR-483-5p  | FC, BDE  |      | UP   | RNA-seq | 44 |
| miR-2277-3p | FC, BDE  |      | UP   | RNA-seq | 44 |
| miR-6858-5p | FC, BDE  |      | UP   | RNA-seq | 44 |
| miR-141-3p  | FC, BDE  |      | UP   | RNA-seq | 44 |
| miR-3607-3p | FC, BDE  |      | UP   | RNA-seq | 44 |
| miR-520g-3p | FC, BDE  |      | UP   | RNA-seq | 44 |
| miR-517b-3p | FC, BDE  |      | UP   | RNA-seq | 44 |
| miR-483-3p  | FC, BDE  |      | UP   | RNA-seq | 44 |
| miR1287-3p  | FC, BDE  |      | UP   | RNA-seq | 44 |
| miR-4661-5p | FC, BDE  |      | UP   | RNA-seq | 44 |
| miR-424-3p  | FC, BDE  |      | UP   | RNA-seq | 44 |
| miR-193a-5p | FC, BDE  |      | UP   | RNA-seq | 44 |
| let-7d-3p   | FC, BDE  |      | UP   | RNA-seq | 44 |
| miR-584-5p  | FC, BDE  |      | UP   | RNA-seq | 44 |
| miR-204-3p  | FC, BDE  |      | UP   | RNA-seq | 44 |
| miR-320a    | FC, BDE  |      | UP   | RNA-seq | 44 |
| miR-16-2-3p | FC, BDE  |      | UP   | RNA-seq | 44 |
| miR-26b-3p  | FC, BDE  |      | UP   | RNA-seq | 44 |
| miR-34c-3p  | FC, BDE  |      | UP   | RNA-seq | 44 |
| miR-199a-3p | FC, BDE  |      | UP   | RNA-seq | 44 |
| miR-200c-3p | FC, BDE  |      | UP   | RNA-seq | 44 |
| miR-23a-3p  | FC, BDE  |      | UP   | RNA-seq | 44 |
| let-7b-3p   | FC, BDE  |      | UP   | RNA-seq | 44 |
| miR-298     | TL       |      | DOWN | qRT-PCR | 45 |
| miR-128a    | TNC      |      | DOWN | qRT-PCR | 46 |
| miR-128b    | TNC      |      | DOWN | qRT-PCR | 46 |
| miR-128b    | FNC      |      | DOWN | qRT-PCR | 46 |
| miR-15b     | FC       |      | DOWN | qRT-PCR | 47 |
| miR-132-3p  |          |      | DOWN | qRT-PCR | 48 |
| miR-100     |          |      | DOWN | qRT-PCR | 48 |
| miR-30e-3p  |          |      | DOWN | qRT-PCR | 49 |
| miR-365b-5p |          |      | DOWN | qRT-PCR | 49 |
| miR-664-3p  |          |      | DOWN | qRT-PCR | 49 |
| miR-1202    |          |      | DOWN | qRT-PCR | 49 |
| miR-4286    |          |      | DOWN | qRT-PCR | 49 |
| miR-4410    |          |      | DOWN | qRT-PCR | 49 |
| miR-455-3p  | FC, BA10 |      | UP   | qRT-PCR | 50 |
| miR-4674    | FC, BA10 | VI   | UP   | qRT-PCR | 51 |
| miR-6722    | FC, BA10 | VI   | UP   | qRT-PCR | 51 |
| miR-455-3p  | FC, BA10 | V    | UP   | qRT-PCR | 51 |
| miR-3613-3p | FC, BA10 | V    | UP   | qRT-PCR | 51 |

|              |          |  |      |         |    |
|--------------|----------|--|------|---------|----|
| miR-122-5p   | FC, BA10 |  | DOWN | qRT-PCR | 51 |
| miR-132-3p   | HC       |  | DOWN | RNA-seq | 52 |
| miR-128      | HC       |  | DOWN | RNA-seq | 52 |
| miR-23a-3p   | HC       |  | UP   | RNA-seq | 52 |
| miR-455-5p   | HC       |  | UP   | RNA-seq | 52 |
| miR-129-5p   | HC       |  | DOWN | RNA-seq | 52 |
| miR-362-3p   | HC       |  | UP   | RNA-seq | 52 |
| miR-27a-3p   | HC       |  | UP   | RNA-seq | 52 |
| miR-370      | HC       |  | DOWN | RNA-seq | 52 |
| miR-487b     | HC       |  | DOWN | RNA-seq | 52 |
| let-7f-5p    | HC       |  | UP   | RNA-seq | 52 |
| miR-223-3p   | HC       |  | UP   | RNA-seq | 52 |
| miR-433      | HC       |  | DOWN | RNA-seq | 52 |
| miR-195-5p   | HC       |  | UP   | RNA-seq | 52 |
| miR-138-5p   | HC       |  | DOWN | RNA-seq | 52 |
| miR-142-3p   | HC       |  | UP   | RNA-seq | 52 |
| miR-129-2-3p | HC       |  | DOWN | RNA-seq | 52 |
| miR-150-5p   | HC       |  | UP   | RNA-seq | 52 |
| miR-136-5p   | HC       |  | DOWN | RNA-seq | 52 |
| let-7i-5p    | HC       |  | UP   | RNA-seq | 52 |
| miR-124-3p   | HC       |  | DOWN | RNA-seq | 52 |
| miR-362-3p   | HC       |  | UP   | RNA-seq | 52 |
| miR-92b-3p   | HC       |  | UP   | RNA-seq | 52 |
| miR-127-3p   | HC       |  | UP   | RNA-seq | 52 |
| miR-329      | HC       |  | DOWN | RNA-seq | 52 |
| miR-495-3p   | HC       |  | DOWN | RNA-seq | 52 |
| miR-409-5p   | HC       |  | DOWN | RNA-seq | 52 |
| miR-487a     | HC       |  | DOWN | RNA-seq | 52 |
| miR-410      | HC       |  | DOWN | RNA-seq | 52 |
| miR-543      | HC       |  | DOWN | RNA-seq | 52 |
| miR-199a-3p  | HC       |  | UP   | RNA-seq | 52 |
| miR-199b-3p  | HC       |  | UP   | RNA-seq | 52 |
| miR-769-5p   | HC       |  | DOWN | RNA-seq | 52 |
| miR-219-2-3p | HC       |  | DOWN | RNA-seq | 52 |
| miR-425-5p   | HC       |  | DOWN | RNA-seq | 52 |
| miR-200a-3p  | HC       |  | UP   | RNA-seq | 52 |
| miR-92b-3p   | HC       |  | DOWN | qRT-PCR | 52 |
| miR-129-2-3p | HC       |  | DOWN | qRT-PCR | 52 |
| miR-129-5p   | HC       |  | DOWN | qRT-PCR | 52 |
| miR-132-3p   | HC       |  | DOWN | qRT-PCR | 52 |
| miR-136-5p   | HC       |  | DOWN | qRT-PCR | 52 |
| miR-370      | HC       |  | DOWN | qRT-PCR | 52 |
| miR-409-5p   | HC       |  | DOWN | qRT-PCR | 52 |
| miR-487a     | HC       |  | DOWN | qRT-PCR | 52 |
| miR-129-5p   | PFC      |  | DOWN | qRT-PCR | 52 |
| miR-132-3p   | PFC      |  | DOWN | qRT-PCR | 52 |

|            |       |        |      |         |    |
|------------|-------|--------|------|---------|----|
| miR-136-5p | PFC   |        | DOWN | qRT-PCR | 52 |
| miR-132-3p | TG    |        | DOWN | qRT-PCR | 52 |
| miR-29c    | FC    |        | DOWN | qRT-PCR | 53 |
| miR-219-5p | FC    | IV-V   | DOWN | qRT-PCR | 54 |
| miR-132    | TL    |        | UP   | qRT-PCR | 55 |
| miR-27a-3p | LC    | III-IV | UP   | qRT-PCR | 56 |
| miR-124-3p | LC    | III-IV | UP   | qRT-PCR | 56 |
| miR-143-3p | LC    | III-IV | UP   | qRT-PCR | 56 |
| miR-143-3p | EC    | III-IV | UP   | qRT-PCR | 56 |
| miR-16     | HC    | III-IV | UP   | qRT-PCR | 56 |
| miR-16     | HC    | VI     | DOWN | qRT-PCR | 56 |
| miR-34c    | HC    | III-IV | UP   | qRT-PCR | 56 |
| miR-107    | HC    | VI     | DOWN | qRT-PCR | 56 |
| miR-128a   | HC    | VI     | DOWN | qRT-PCR | 56 |
| miR-146a   | HC    | III-IV | UP   | qRT-PCR | 56 |
| miR-146a   | HC    | VI     | DOWN | qRT-PCR | 56 |
| miR-103    | TC    |        | DOWN | qRT-PCR | 57 |
| miR-107    | TC    |        | DOWN | qRT-PCR | 57 |
| miR-15b    | TC    |        | DOWN | qRT-PCR | 57 |
| miR-16     | TC    |        | DOWN | qRT-PCR | 57 |
| miR-195    | TC    |        | DOWN | qRT-PCR | 57 |
| miR-103    | HC    |        | DOWN | qRT-PCR | 57 |
| miR-107    | HC    |        | DOWN | qRT-PCR | 57 |
| miR-15b    | HC    |        | DOWN | qRT-PCR | 57 |
| miR-16     | HC    |        | DOWN | qRT-PCR | 57 |
| miR-195    | HC    |        | DOWN | qRT-PCR | 57 |
| miR-132-3p | TC    |        | DOWN | qRT-PCR | 59 |
| miR-212-3p | TC    |        | DOWN | qRT-PCR | 59 |
| miR-132-3p | PFC   |        | DOWN | qRT-PCR | 59 |
| miR-212-3p | PFC   |        | DOWN | qRT-PCR | 59 |
| miR-132-3p | PFC   |        | DOWN | qRT-PCR | 59 |
| miR-212-3p | PFC   |        | DOWN | qRT-PCR | 59 |
| miR-338-5p | HC    |        | DOWN | qRT-PCR | 60 |
| miR-219-5p | BA9   |        | DOWN | qRT-PCR | 61 |
| miR-124    | HC    |        | UP   | qRT-PCR | 62 |
| miR-124    | TC    |        | UP   | qRT-PCR | 62 |
| miR-132    | TC    | III-IV | DOWN | qRT-PCR | 63 |
| miR-132    | TC    | VI     | DOWN | qRT-PCR | 63 |
| miR-212    | TC    | VI     | UP   | qRT-PCR | 63 |
| miR-425-5p | FC    |        | UP   | qRT-PCR | 64 |
| miR-603    | HC    |        | UP   | qRT-PCR | 65 |
| miR-7      | H, TL |        | UP   | qRT-PCR | 66 |
| miR-146a   | H, TL |        | UP   | qRT-PCR | 66 |
| miR-155    | H, TL |        | UP   | qRT-PCR | 66 |
| miR-34a    | HC    |        | UP   | qRT-PCR | 67 |
| miR-125b   | HC    |        | UP   | qRT-PCR | 67 |

|          |    |  |    |         |    |
|----------|----|--|----|---------|----|
| miR-146a | HC |  | UP | qRT-PCR | 67 |
| miR-155  | HC |  | UP | qRT-PCR | 67 |

### **Analysis of MiRNA Targets through DIANA Pathway Analysis**

DIANA is the most extensive bioinformatics tool used for miRNA pathway analysis. The database applies algorithms to assess the biological significance of miRNA associations and predict their function via experimentally validated data in TarBase or in silico predicted targets in microT-CDS. This study aims to identify novel pathways so the microT-CDS database, which predicts miRNA targets in the 3'UTR and coding sequences of genes without experimental validation, was utilised. The 113 miRNAs identified either by qRT-PCR or RNAseq in the selected 28 studies were individually uploaded to DIANA and a superset of gene targets was identified. Where selected genes unite on a particular Kyoto Encyclopaedia of Genes and Genomes (KEGG) pathway with ( $p < 0.05$ ), this was noted as statistically significant and potential role for miRNA regulation in AD were proposed.

All miRNA identified through the literature search checked for their unique identifiers through MirBase. The following are the miRNA identifiers that were entered into the DIANA database for KEGG pathway analysis: let-7b-3p, let-7d-3p, let-7f-5p, let-7i-5p, miR-100, miR-103, miR-107, miR-10a-5p, miR-1202, miR-122-5p, miR-124-3p, miR-125b, miR-127-3p, miR-128, miR-128a, miR-128b, miR-129-2-3p, miR-129-5p, miR-132-3p, miR-132-5p, miR-136-5p, miR-138-5p, miR-141-3p, miR-142-3p, miR-143-3p, miR-146, miR-146a, miR-150-5p, miR-155, miR-15b, miR-16, miR-16-2-3p, miR-17-5p, miR-184, miR-18a-5p, miR-190a-5p, miR-193a-5p, miR-195-5p, miR-199a-3p, miR-199b-3p, miR-200a-3p, miR-200b-5p, miR-200c-3p, miR-204-3p, miR-212-3p, miR-212-5p, miR-219-2-3p, miR-219-5p, miR-219a-2-3p, miR-223-3p, miR-2277-3p, miR-23a-3p, miR-26b-3p, miR-27a-3p, miR-27a-3p, miR-28-3p, miR-298, miR-29c, miR-30a-3p, miR-30e-3p, miR-3157-5p, miR-320a, miR-329, miR-338-5p, miR-346, miR-34a, miR-34c-3p, miR-3607-3p, miR-3613-3p, miR-362-3p, miR-365b-5p, miR-370, miR-374b-5b, miR-374c-3p, miR-375, miR-409-5p, miR-410, miR-424-3p, miR-425-5p, miR-4284, miR-433, miR-4410, miR-455-3p, miR-4661-5p, miR-4674, miR-483-3p, miR-483-5p, miR-486-3p, miR-487a, miR-487b, miR-495-3p, miR-5001-3p, miR-501-3p, miR-517b-3p, miR-520g-3p, miR-539-5p, miR-539-5p, miR-543, miR-548v, miR-550a-3p, miR-550b-2-5p, miR-582-5p, miR-584-5p, miR-603, miR-664-3p, miR-6722, miR-6858-5p, miR-7, miR-769-5p, miR-889-3p, miR-9, miR-92b-3p, miR-941.

### **Analysis of Proteins through DAVID Pathway Analysis**

From the 26 included papers, a total of 169 different proteins were found to be differentially expressed in AD. These proteins are listed here: ACHE, AGER, AGT, AHNAK, AIF1, ALAD, AMY1A, ANXA5, APP, AQP4, ARNTL, ASAH1, BACE1, BAG3, BCR, C3, CASP3, CCL2, CCR1, CHGA, CLOCK, CLU, CP, CSNK1E, CTSB, DBI, DKK3, ESD, FGA, FGB, FGG, GJA1, H3F3A, HDGF, HIST1H1C, HIST1H1E, HP, HPX, HSPA1A, HSPB1, IGHA1, IGHG1, IGKC, ISYNA1, ITIH4, LGMN, MAOB, MAP4, MAPT, MARCKS, MECP2, MSI1, MSI2, NAMPT, NFKB1, NPTN, NUCKS1, ORM1, PADI2, PAICS, PBXIP1, PCBD1, PLIN3, PNPO, PRDX1, PRDX6, RAB5A, RAB7A, RBM15B, RIDA, S100A1, S100A11, S100A6, S100A9, SAA1, SELENBP1, SERPINA1, SERPINA3, SERPING1, SOCS4, SOCS7, SPR, STOM, TARDBP, TPD52L1, TREM2, TYROBP, ABCB1, ACTN2, ADAP1, AP1G1, APOE, BIN1, CADPS, CAP2, CIRBP, CORO1A, CORO2B, CRAT, CREB1, CREBBP, DLAT, DLG4, DNAJC6, DNM3, DUSP3, EEF1A1, EEF1B2, EP300, FARSB, GAS7, GLS, GRPEL1, HGS, HOMER1, HSPA4L, IARS2, IDE, IDH3G, IPO7, KIAA0513, KIF5C, LONP1, LRPAP1, LRPPRC, LZTFL1, MAPRE3, METTL3, MME, NDUFA10, NECAB1, OAT, OGDH, OGDHL, OTUB1, OXCT1, PAFAH1B1, PDHX, PDIA3, PHYHIPL, PPME1, PPP2R1A, PREP, PRKRA, PTPA, RAP1GDS1, RGS7, RPH3A, SARS2, SCAI, SDR39U1, SGTB, SH3GL1, SLC2A3, SLIRP, SMS, SNAP25, STXBP1, STXBP3, SUCLA2, SUCLG1, TIMM44, TLN2, TRAP1, VPS35, YARS, YWHAG, YWHAH, YWHAQ

The identified DE-proteins were uploaded to the DAVID database to perform enrichment analysis and pathway identification. Within the DAVID database, the KEGG pathway maps were used to identify the protein pathways that the uploaded DE protein list was associated with. All proteins were uploaded as a gene list under the species "Homo sapiens". Following the pathway tab in the annotation summary results, the KEGG\_PATHWAY chart was selected. Despite all 169 protein IDs being recognised only 99 were associated with KEGG pathways that yielded a total of 164 different KEGG pathways. To determine which pathways were the most significant, functional enrichment analysis was performed using a minimum gene count  $\geq 3$  and a maximum EASE score of 0.1.



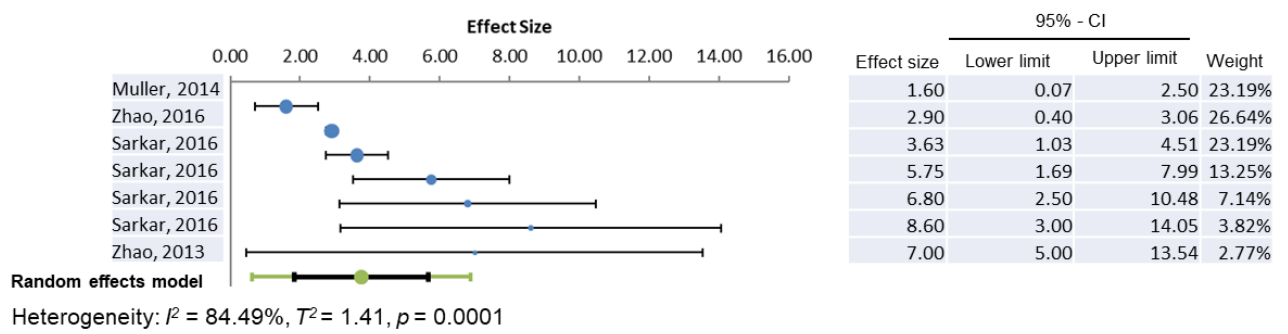

**Figure S1.** Meta analysis for miR-146a (upregulated miRs).





|                                           |   |   |   |   |   |   |   |   |   |   |   |   |   |   |   |   |   |    |
|-------------------------------------------|---|---|---|---|---|---|---|---|---|---|---|---|---|---|---|---|---|----|
| Lei <i>et al.</i> 2015 (53)               | + | + | - | + | + | + | + | + | + | + | + | + | + | + | - | + | + | 88 |
| Li <i>et al.</i> 2019 (54)                | + | + | - | + | + | - | + | + | + | + | + | + | + | + | - | + | + | 82 |
| Liu <i>et al.</i> 2019 (55)               | + | + | - | + | - | - | + | + | + | + | + | + | + | + | - | + | + | 76 |
| Llorens <i>et al.</i> 2017 (56)           | + | + | - | + | + | - | + | + | + | + | + | + | + | + | - | + | + | 82 |
| Long <i>et al.</i> 2019 (28)              | + | + | + | + | + | + | + | + | + | + | + | + | + | + | + | - | + | 94 |
| Moncini <i>et al.</i> 2016 (57)           | + | + | - | + | + | + | + | + | + | + | + | + | + | + | - | + | + | 88 |
| Muller <i>et al.</i> 2014 (59)            | + | + | - | + | + | + | + | + | + | + | - | + | + | + | + | + | + | 88 |
| Pichler <i>et al.</i> 2017 (59)           | + | + | + | + | + | + | + | + | + | + | - | + | + | + | - | + | + | 88 |
| Qian <i>et al.</i> 2019 (60)              | + | + | - | + | + | + | + | + | + | + | + | + | + | + | - | + | + | 88 |
| Santa-Maria <i>et al.</i> 2015 (61)       | + | + | - | + | + | + | + | + | + | + | + | + | + | + | + | + | + | 92 |
| Sarkar <i>et al.</i> 2016 (27)            | + | + | - | + | + | + | + | + | + | + | + | + | + | + | - | + | + | 88 |
| Wang <i>et al.</i> 2018 (62)              | + | + | - | + | - | - | + | + | + | + | + | + | + | + | - | + | + | 71 |
| Wong <i>et al.</i> 2013 (63)              | + | + | - | + | + | - | + | + | + | + | + | + | + | + | - | + | + | 88 |
| Yuan <i>et al.</i> 2020 (64)              | + | + | - | + | + | - | + | + | + | + | + | + | + | + | - | + | + | 82 |
| Zhang <i>et al.</i> 2016 (65)             | - | + | - | + | + | - | + | + | + | + | + | + | + | + | + | + | + | 82 |
| Zhao <i>et al.</i> 2013 (66)              | + | + | - | + | - | - | + | + | + | + | + | - | + | + | - | + | + | 82 |
| Zhao et al. 2016 (67)                     | + | + | - | + | + | + | + | + | + | + | + | + | + | + | - | + | + | 88 |
| Zhong et al. 2018 (33)                    | + | + | - | + | + | - | + | + | + | + | + | + | + | + | - | + | + | 82 |
| Notes: - =YES, + = NO, X = Not Applicable |   |   |   |   |   |   |   |   |   |   |   |   |   |   |   |   |   |    |

**Table S2B.** AXIS quality appraisal tool results for protein studies.

|                                   | Intro                                            |                                                           | Methods                                          |                                                                                                   |                                                                                                                                                       |                                                                                                                                                      |                                                                                          |                                                                                                                                                          |                                                                                                |                                                                                                            | Results                                       |                                             |                                                                              | Discussion                                                                 |                                                  | Other                                                                                                                  |                                                               | Total     |
|-----------------------------------|--------------------------------------------------|-----------------------------------------------------------|--------------------------------------------------|---------------------------------------------------------------------------------------------------|-------------------------------------------------------------------------------------------------------------------------------------------------------|------------------------------------------------------------------------------------------------------------------------------------------------------|------------------------------------------------------------------------------------------|----------------------------------------------------------------------------------------------------------------------------------------------------------|------------------------------------------------------------------------------------------------|------------------------------------------------------------------------------------------------------------|-----------------------------------------------|---------------------------------------------|------------------------------------------------------------------------------|----------------------------------------------------------------------------|--------------------------------------------------|------------------------------------------------------------------------------------------------------------------------|---------------------------------------------------------------|-----------|
|                                   | 1) were the aims/ objectives of the study clear? | 2) was the study design appropriate for the stated aim(s) | -3) was the sample size of the groups justified? | 4) was the target/reference population clearly defined? / is it clear who the research was about? | 5) was the sample frame taken from an appropriate population base so that it closely represented the target/reference population under investigation? | 6) Was the selection process likely to select subjects/participants that were representative of the target reference population under investigation? | 7) were risk factor and outcome variables measures appropriate to the aims of the study? | 8) were the risk factor and outcome variables measured correctly using instruments/measurements that had been trialled, piloted or published previously? | 9) is it clear what was used to determine statistical significance and/or precision estimates? | 10) were the methods (including statistical methods) sufficiently described to enable them to be repeated? | 11) were the basic data adequately described? | 12) Were the results internally consistent? | 13) were the results presented for all the analyses described in the method? | 14) were the authors discussions and conclusions justified by the results? | 15) were the limitations of the study discussed? | 16) were there any funding sources or conflicts of interest that may affect the authors interpretation of the results? | 17) was ethical approval or consent of participants attained? | Score (%) |
| Beckelman <i>et al.</i> 2016 (68) | +                                                | +                                                         | -                                                | +                                                                                                 | +                                                                                                                                                     | +                                                                                                                                                    | +                                                                                        | +                                                                                                                                                        | +                                                                                              | +                                                                                                          | +                                             | +                                           | +                                                                            | +                                                                          | -                                                | -                                                                                                                      | +                                                             | 82        |
| Chiu <i>et al.</i> 2015 (69)      | +                                                | +                                                         | +                                                | +                                                                                                 | +                                                                                                                                                     | +                                                                                                                                                    | +                                                                                        | +                                                                                                                                                        | +                                                                                              | +                                                                                                          | +                                             | +                                           | +                                                                            | +                                                                          | +                                                | +                                                                                                                      | +                                                             | 100       |
| Shepherd <i>et al.</i> 2020 (70)  | +                                                | +                                                         | -                                                | +                                                                                                 | +                                                                                                                                                     | +                                                                                                                                                    | +                                                                                        | +                                                                                                                                                        | +                                                                                              | +                                                                                                          | +                                             | +                                           | +                                                                            | +                                                                          | -                                                | -                                                                                                                      | +                                                             | 82        |
| Chen <i>et al.</i> 2012 (71)      | -                                                | +                                                         | -                                                | +                                                                                                 | +                                                                                                                                                     | +                                                                                                                                                    | +                                                                                        | +                                                                                                                                                        | -                                                                                              | -                                                                                                          | +                                             | +                                           | +                                                                            | +                                                                          | -                                                | -                                                                                                                      | +                                                             | 65        |
| Holler <i>et al.</i> 2014 (72)    | +                                                | +                                                         | -                                                | +                                                                                                 | +                                                                                                                                                     | +                                                                                                                                                    | +                                                                                        | +                                                                                                                                                        | +                                                                                              | +                                                                                                          | +                                             | +                                           | +                                                                            | +                                                                          | -                                                | +                                                                                                                      | +                                                             | 88        |
| Walker <i>et al.</i> 2015 (73)    | +                                                | +                                                         | -                                                | +                                                                                                 | +                                                                                                                                                     | +                                                                                                                                                    | +                                                                                        | +                                                                                                                                                        | +                                                                                              | +                                                                                                          | +                                             | +                                           | +                                                                            | +                                                                          | -                                                | +                                                                                                                      | +                                                             | 88        |
| Glennon <i>et al.</i> 2013 (74)   | -                                                | +                                                         | -                                                | +                                                                                                 | +                                                                                                                                                     | +                                                                                                                                                    | +                                                                                        | +                                                                                                                                                        | +                                                                                              | +                                                                                                          | +                                             | +                                           | +                                                                            | +                                                                          | -                                                | +                                                                                                                      | +                                                             | 82        |

|                                    |   |   |   |   |   |   |   |   |   |   |   |   |   |   |   |   |   |     |
|------------------------------------|---|---|---|---|---|---|---|---|---|---|---|---|---|---|---|---|---|-----|
| Byman <i>et al.</i> 2018 (75)      | + | + | - | + | + | + | + | + | + | + | + | + | - | + | + | - | + | 82  |
| Huang <i>et al.</i> 2020 (76)      | + | + | - | + | + | + | + | + | + | + | + | + | + | + | + | X | + | 88  |
| Yoo <i>et al.</i> 2020 (77)        | + | + | - | + | + | + | + | + | + | + | + | + | + | + | - | + | + | 88  |
| Chen <i>et al.</i> 2012 (78)       | + | + | - | + | + | + | + | + | - | - | + | + | + | + | + | + | + | 82  |
| Gu <i>et al.</i> 2020 (79)         | + | + | - | + | + | + | + | + | + | + | + | + | + | + | - | + | + | 88  |
| Xu <i>et al.</i> 2019 (80)         | + | + | - | + | + | + | + | + | - | - | + | + | + | + | - | + | + | 76  |
| Batkulwar <i>et al.</i> 2018 (81)  | + | + | - | + | + | + | + | + | + | + | + | + | + | + | - | + | + | 88  |
| Ilic <i>et al.</i> 2019 (82)       | + | + | - | + | + | + | + | + | + | + | + | + | + | + | - | + | + | 88  |
| Lue <i>et al.</i> 2015 (83)        | + | + | - | + | + | + | + | + | + | + | + | + | + | + | - | + | + | 88  |
| Bekris <i>et al.</i> 2010 (84)     | + | + | + | + | + | + | + | + | + | + | + | + | + | + | + | + | + | 100 |
| Causevic <i>et al.</i> 2010 (85)   | + | + | - | + | + | + | + | + | + | + | + | + | - | + | + | X | + | 82  |
| Campanari <i>et al.</i> 2016 (86)  | - | + | - | + | + | + | + | + | + | + | + | + | + | + | - | + | + | 82  |
| Bartolotti <i>et al.</i> 2016 (87) | + | + | - | + | + | + | + | + | - | - | + | + | + | + | + | + | + | 82  |
| Jin <i>et al.</i> 2013 (88)        | - | + | - | + | + | + | + | + | + | + | + | + | + | + | - | + | + | 82  |
| Gu <i>et al.</i> 2020 (89)         | + | + | - | + | + | + | + | + | - | - | + | + | + | + | - | - | + | 71  |
| Ginsberg <i>et al.</i> 2010 (90)   | + | + | - | + | + | + | + | + | + | + | + | + | + | + | - | + | + | 88  |
| Wang <i>et al.</i> 2010 (91)       | - | + | - | + | + | + | + | + | + | + | + | + | + | + | - | + | + | 82  |
| Sengupta <i>et al.</i> 2018 (93)   | - | + | - | + | + | + | + | + | + | + | + | + | + | + | - | + | + | 82  |
| Liao <i>et al.</i> 2016 (93)       | + | + | - | + | + | + | + | + | + | + | + | + | + | + | - | - | + | 82  |

**Notes:** - =YES, + = NO, X = Not Applicable

**Table S3A.** Risk of bias in miRNA studies

|                                     | Bias arising from randomisation process | Bias due to deviations from intended interventions | Bias due to missing data | Bias in management of outcomes | Bias in selection of the reported result | Overall bias |
|-------------------------------------|-----------------------------------------|----------------------------------------------------|--------------------------|--------------------------------|------------------------------------------|--------------|
| Annese <i>et al.</i> 2020 (43)      | -                                       | +                                                  | +                        | +                              | +                                        | +            |
| Cheng <i>et al.</i> 2020 (44)       | -                                       | +                                                  | +                        | +                              | +                                        | +            |
| Chopra <i>et al.</i> 2020 (45)      | -                                       | +                                                  | +                        | +                              | +                                        | +            |
| Culpan <i>et al.</i> 2012 (46)      | -                                       | +                                                  | +                        | +                              | +                                        | +            |
| Gong <i>et al.</i> 2017 (47)        | -                                       | +                                                  | +                        | +                              | +                                        | +            |
| Henriques <i>et al.</i> 2020 (49)   | X                                       | +                                                  | +                        | +                              | +                                        | +            |
| Herbert <i>et al.</i> 2013 (48)     | -                                       | +                                                  | +                        | +                              | +                                        | +            |
| Kumar <i>et al.</i> 2017 (51)       | -                                       | +                                                  | +                        | +                              | +                                        | +            |
| Kumar <i>et al.</i> 2018 (50)       | -                                       | +                                                  | +                        | +                              | +                                        | +            |
| Lau <i>et al.</i> 2013 (52)         | -                                       | +                                                  | +                        | +                              | +                                        | +            |
| Lei <i>et al.</i> 2015 (53)         | -                                       | +                                                  | +                        | +                              | +                                        | +            |
| Li <i>et al.</i> 2019 (54)          | -                                       | +                                                  | +                        | +                              | +                                        | +            |
| Liu <i>et al.</i> 2019 (55)         | -                                       | +                                                  | +                        | +                              | +                                        | +            |
| Llorens <i>et al.</i> 2017 (56)     | -                                       | +                                                  | +                        | +                              | +                                        | +            |
| Long <i>et al.</i> 2019 (28)        | +                                       | +                                                  | +                        | +                              | +                                        | +            |
| Moncini <i>et al.</i> 2016 (57)     | -                                       | +                                                  | +                        | +                              | +                                        | +            |
| Muller <i>et al.</i> 2014 (58)      | -                                       | +                                                  | +                        | +                              | +                                        | +            |
| Pichler <i>et al.</i> 2017 (59)     | -                                       | +                                                  | +                        | +                              | +                                        | +            |
| Qian <i>et al.</i> 2019 (60)        | -                                       | +                                                  | +                        | +                              | +                                        | +            |
| Santa-Maria <i>et al.</i> 2015 (61) | -                                       | +                                                  | +                        | +                              | +                                        | +            |
| Sarkar <i>et al.</i> 2016 (27)      | -                                       | +                                                  | +                        | +                              | +                                        | +            |
| Wang <i>et al.</i> 2018 (62)        | -                                       | +                                                  | +                        | +                              | +                                        | +            |
| Wong <i>et al.</i> 2013 (63)        | -                                       | +                                                  | +                        | +                              | +                                        | +            |
| Yuan <i>et al.</i> 2020 (64)        | -                                       | +                                                  | +                        | +                              | +                                        | +            |

|                                                  |   |   |   |   |   |   |
|--------------------------------------------------|---|---|---|---|---|---|
| Zhang <i>et al.</i> 2016 (65)                    | + | + | + | + | + | + |
| Zhao <i>et al.</i> 2013 (66)                     | - | + | + | + | + | + |
| Zhao et al. 2016 (67)                            | - | + | + | + | X | + |
| Zhong et al. 2018 (33)                           | - | + | + | + | + | + |
| <b>Notes:</b> - =YES, + = NO, X = Not Applicable |   |   |   |   |   |   |



**Table S3B.** Risk of bias in miRNA studies

[illegible]

Table S4A.

| miRNA      | brain region | Braak stage | fold change | SD   | no. AD | Age AD | sex AD | no C | age C | sex C | PMI (hrs)                          | storage                    | extraction                                                           | selection | normalised to: | analysis                      | reference         |
|------------|--------------|-------------|-------------|------|--------|--------|--------|------|-------|-------|------------------------------------|----------------------------|----------------------------------------------------------------------|-----------|----------------|-------------------------------|-------------------|
| miR-132-3p | MFG          | v-vi        | 0.125       | 0.2  | 5      | -      |        | 5    | -     |       | C=(42+-14.86)<br>AD=(19.56+-10.27) |                            | TaqMan™ Advanced miRNA cDNA Synthesis Kit (Thermo Fisher Scientific) |           | -              | qRT-PCR assay original cohort | Annese et al 2018 |
| miR-132-3p | MTG          | v-vi        | 0.9         | 0.3  | 5      | -      |        | 5    | -     |       |                                    |                            |                                                                      |           |                | qRT-PCR assay original cohort | Annese et al 2019 |
| miR-132-3p | HC           | v-vi        | 0.3         | 0.4  | 9      | -      | .+4m   | 9    | -     | .+4m  |                                    |                            |                                                                      |           |                | qRT-PCR enlarged cohort       | Annese et al 2020 |
| miR-132-3p | PFC          | v           | 0.33        | 0.3  | 41     | -      |        | 23   | -     |       |                                    | frozen in liquid nitrogen. | Trizol® (Invitrogen)                                                 |           | miR-9-5p.      | qRT-PCR validation study      | Lau et al 2013    |
| miR-132-3p | TG           | v           | 0.35        | 0.5  | 41     | -      |        | 23   | -     |       |                                    |                            |                                                                      |           |                | qRT-PCR validation study      | Lau et al 2014    |
| miR-132-3p | HC           | v           | 0.5         | 0.2  | 41     | -      |        | 23   | -     |       |                                    |                            |                                                                      |           |                | qRT-PCR validation study      | Lau et al 2015    |
| miR-132-3p | CB           | all         | 0.1         | 0.01 | 13     | 75.6   | 6m.7f  | 10   | 76.5  | 5m.5f | c=11.3<br>AD=14.5                  | frozen                     | miRNeasy Micro Kit                                                   | databases | -              | qRT-PCR                       | Sarkar et al 2016 |

[illegible]

[illegible]

**Notes:** HC=Hippocampus, TC=Temporal Cortex, MTG=Medial Temporal Gyrus, MFG = Medial Frontal Gyrus FC = Frontal Cortex, CB = Cerebellum, FNC = Frontal Neo Cortex, STG = Superior temporal gyrus, BDE= Brain Derived Exosome

Table S4C.

| miRNA  | brain region | Braak stage | fold change | SD   | analysis | no AD | age AD | sex AD | no C | age C   | sex C   | PMI (hr)                  | storage | extraction                  | selection | reference         |
|--------|--------------|-------------|-------------|------|----------|-------|--------|--------|------|---------|---------|---------------------------|---------|-----------------------------|-----------|-------------------|
| miR-16 | HC           | -           | 0.3         | 0.15 | RT-qPCR  | 12    | 83     | 7m.5f  | 12   | matched | matched | (PMI) < 25<br>(mean = 10) |         |                             |           | Monici et al 2016 |
| miR-16 | TC           | -           | 0.44        | 0.22 | RT-qPCR  | 12    | 83     | 7m.5f  | 12   | matched | matched |                           |         | TRIzol reagent (Invitrogen) |           | Monici et al 2017 |
| miR-16 | FC           | -           | 0.5         | 0.1  | qRT-PCR  | 30    | 80-95  | -      | 20   | 80-95   | -       | <4                        | -       | Trizol reagent (Invitrogen) |           | Zhong et al 2018  |
| miR-16 | HC           | vi          | 0.5         | 0.01 | qRT-PCR  | 10    |        |        | 6    |         |         |                           |         |                             |           | Muller et al 2014 |
| miR-16 | FC           | -           | 0.5         | 0.1  | qRT-PCR  | 30    | 80-95  |        | 20   | 80-95   |         | <4                        |         | Trizol reagent (Invitrogen) |           | Zhong et al 2018  |

**Notes:** HC=Hippocampus, TC=Temporal Cortex, MTG=Medial Temporal Gyrus, MFG = Medial Frontal Gyrus FC = Frontal Cortex, CB = Cerebellum, FNC = Frontal Neo Cortex, STG = Superior temporal gyrus, BDE= Brain Derived Exosome

Table S4D.

| miRNA      | brain region | braak stage | fold change | SD  | normalised | analysis                      | no AD | age AD | sex AD | no C | age C | sex C  | PMI (hr)                                 | storage        | extraction                                                    | selection | reference         |
|------------|--------------|-------------|-------------|-----|------------|-------------------------------|-------|--------|--------|------|-------|--------|------------------------------------------|----------------|---------------------------------------------------------------|-----------|-------------------|
| miR-212-3p | MFG          |             | 0.12        | 0.2 |            | qRT-PCR assay original cohort | 5     | 73.75  |        | 5    | 77.25 |        | PMI = C=(42+-14.86)<br>AD=(19.56+-10.27) | frozen         | RNase A (Qiagen)<br>Qiagen miRNeasy with the use of TRIzol-LS |           | Annese et al 2018 |
| miR-212-3p | TC           | vi          | 1           | 0.2 | miR-9      | qPCR                          | 16    | 81.7   | 6m.10f | 16   | 76.5  | 10m.6f |                                          | formalin fixed | Trizol (Invitrogen)<br>Total Nucleic Acid Isolation Kit       |           | Wong et al 2013   |
| miR-212-3p | MTG          |             | 3.5         | 1   |            | qRT-PCR assay original cohort | 5     | 73.75  |        | 5    | 77.25 |        | PMI = C=(42+-14.86)<br>AD=(19.56+-10.27) | frozen         | RNase A (Qiagen)<br>Qiagen miRNeasy with the use of TRIzol-LS |           | Annese et al 2018 |

**Notes:** HC=Hippocampus, TC=Temporal Cortex, MTG=Medial Temporal Gyrus, MFG = Medial Frontal Gyrus FC = Frontal Cortex, CB = Cerebellum, FNC = Frontal Neo Cortex, STG = Superior temporal gyrus, BDE= Brain Derived Exosome
